# Supplementary material for: Identification of Three Genes Encoding for the Late Acyltransferases of Lipid A in Cronobacter sakazakii
Source: MDPI journal article supplement (doi:10.3390/md11020377), 2013-01-31
Supplement: s2 [file s2]

marinedrugs-11-00377-s001.mol
  ChemDraw04241410112D

123124  0  0  0  0  0  0  0  0999 V2000
   -2.0472    5.9116    0.0000 C   0  0  0  0  0  0  0  0  0  0  0  0
   -1.6347    5.1971    0.0000 C   0  0  0  0  0  0  0  0  0  0  0  0
   -0.8366    5.4062    0.0000 C   0  0  0  0  0  0  0  0  0  0  0  0
   -0.0434    5.1971    0.0000 C   0  0  0  0  0  0  0  0  0  0  0  0
   -0.4558    5.9116    0.0000 O   0  0  0  0  0  0  0  0  0  0  0  0
   -1.2540    5.7026    0.0000 C   0  0  0  0  0  0  0  0  0  0  0  0
    0.6711    5.6096    0.0000 O   0  0  0  0  0  0  0  0  0  0  0  0
    1.5833    5.4360    0.0000 C   0  0  0  0  0  0  0  0  0  0  0  0
    1.2528    4.9010    0.0000 C   0  0  0  0  0  0  0  0  0  0  0  0
    1.6653    4.1865    0.0000 C   0  0  0  0  0  0  0  0  0  0  0  0
    2.4634    4.3956    0.0000 C   0  0  0  0  0  0  0  0  0  0  0  0
    3.2566    4.1865    0.0000 C   0  0  0  0  0  0  0  0  0  0  0  0
    2.8442    4.9010    0.0000 O   0  0  0  0  0  0  0  0  0  0  0  0
    2.0460    4.6920    0.0000 C   0  0  0  0  0  0  0  0  0  0  0  0
   -1.8373    6.2860    0.0000 C   0  0  0  0  0  0  0  0  0  0  0  0
   -1.0405    6.4995    0.0000 O   0  0  0  0  0  0  0  0  0  0  0  0
    3.2566    3.3615    0.0000 O   0  0  0  0  0  0  0  0  0  0  0  0
    0.5383    4.4885    0.0000 O   0  0  0  0  0  0  0  0  0  0  0  0
   -2.4316    5.4107    0.0000 O   0  0  0  0  0  0  0  0  0  0  0  0
   -2.8441    4.6962    0.0000 C   0  0  0  0  0  0  0  0  0  0  0  0
   -2.4316    3.9817    0.0000 C   0  0  0  0  0  0  0  0  0  0  0  0
   -2.8441    3.2672    0.0000 C   0  0  0  0  0  0  0  0  0  0  0  0
   -2.4316    2.5528    0.0000 C   0  0  0  0  0  0  0  0  0  0  0  0
   -2.8441    1.8383    0.0000 C   0  0  0  0  0  0  0  0  0  0  0  0
   -2.4316    1.1238    0.0000 C   0  0  0  0  0  0  0  0  0  0  0  0
   -2.8441    0.4094    0.0000 C   0  0  0  0  0  0  0  0  0  0  0  0
   -2.4316   -0.3051    0.0000 C   0  0  0  0  0  0  0  0  0  0  0  0
   -2.8441   -1.0196    0.0000 C   0  0  0  0  0  0  0  0  0  0  0  0
   -2.4316   -1.7340    0.0000 C   0  0  0  0  0  0  0  0  0  0  0  0
   -2.8441   -2.4485    0.0000 C   0  0  0  0  0  0  0  0  0  0  0  0
   -2.4316   -3.1630    0.0000 C   0  0  0  0  0  0  0  0  0  0  0  0
   -2.8441   -3.8775    0.0000 C   0  0  0  0  0  0  0  0  0  0  0  0
   -2.4316   -4.5919    0.0000 C   0  0  0  0  0  0  0  0  0  0  0  0
   -3.6691    4.6962    0.0000 O   0  0  0  0  0  0  0  0  0  0  0  0
   -3.6691    3.2672    0.0000 O   0  0  0  0  0  0  0  0  0  0  0  0
   -4.0816    2.5528    0.0000 C   0  0  0  0  0  0  0  0  0  0  0  0
   -3.6691    1.8383    0.0000 C   0  0  0  0  0  0  0  0  0  0  0  0
   -4.0816    1.1238    0.0000 C   0  0  0  0  0  0  0  0  0  0  0  0
   -3.6691    0.4094    0.0000 C   0  0  0  0  0  0  0  0  0  0  0  0
   -4.0816   -0.3051    0.0000 C   0  0  0  0  0  0  0  0  0  0  0  0
   -3.6691   -1.0196    0.0000 C   0  0  0  0  0  0  0  0  0  0  0  0
   -4.0816   -1.7340    0.0000 C   0  0  0  0  0  0  0  0  0  0  0  0
   -3.6691   -2.4485    0.0000 C   0  0  0  0  0  0  0  0  0  0  0  0
   -4.0816   -3.1630    0.0000 C   0  0  0  0  0  0  0  0  0  0  0  0
   -3.6691   -3.8775    0.0000 C   0  0  0  0  0  0  0  0  0  0  0  0
   -4.0816   -4.5919    0.0000 C   0  0  0  0  0  0  0  0  0  0  0  0
   -3.6691   -5.3064    0.0000 C   0  0  0  0  0  0  0  0  0  0  0  0
   -4.0816   -6.0209    0.0000 C   0  0  0  0  0  0  0  0  0  0  0  0
   -3.6691   -6.7353    0.0000 C   0  0  0  0  0  0  0  0  0  0  0  0
   -4.9066    2.5528    0.0000 O   0  0  0  0  0  0  0  0  0  0  0  0
   -0.3908    4.7289    0.0000 N   0  0  0  0  0  0  0  0  0  0  0  0
   -0.8033    4.0144    0.0000 C   0  0  0  0  0  0  0  0  0  0  0  0
   -1.6283    4.0144    0.0000 O   0  0  0  0  0  0  0  0  0  0  0  0
   -0.3908    3.2999    0.0000 C   0  0  0  0  0  0  0  0  0  0  0  0
   -0.8033    2.5854    0.0000 C   0  0  0  0  0  0  0  0  0  0  0  0
   -0.3908    1.8710    0.0000 C   0  0  0  0  0  0  0  0  0  0  0  0
   -0.8033    1.1565    0.0000 C   0  0  0  0  0  0  0  0  0  0  0  0
   -0.3908    0.4420    0.0000 C   0  0  0  0  0  0  0  0  0  0  0  0
   -0.8033   -0.2724    0.0000 C   0  0  0  0  0  0  0  0  0  0  0  0
   -0.3908   -0.9869    0.0000 C   0  0  0  0  0  0  0  0  0  0  0  0
   -0.8033   -1.7014    0.0000 C   0  0  0  0  0  0  0  0  0  0  0  0
   -0.3908   -2.4159    0.0000 C   0  0  0  0  0  0  0  0  0  0  0  0
   -0.8033   -3.1303    0.0000 C   0  0  0  0  0  0  0  0  0  0  0  0
   -0.3908   -3.8448    0.0000 C   0  0  0  0  0  0  0  0  0  0  0  0
   -0.8033   -4.5593    0.0000 C   0  0  0  0  0  0  0  0  0  0  0  0
   -0.3908   -5.2737    0.0000 C   0  0  0  0  0  0  0  0  0  0  0  0
   -1.6283    2.5854    0.0000 O   0  0  0  0  0  0  0  0  0  0  0  0
   -2.0408    1.8710    0.0000 C   0  0  0  0  0  0  0  0  0  0  0  0
   -1.6283    1.1565    0.0000 C   0  0  0  0  0  0  0  0  0  0  0  0
   -2.0408    0.4420    0.0000 C   0  0  0  0  0  0  0  0  0  0  0  0
   -1.6283   -0.2724    0.0000 C   0  0  0  0  0  0  0  0  0  0  0  0
   -2.0408   -0.9869    0.0000 C   0  0  0  0  0  0  0  0  0  0  0  0
   -1.6283   -1.7014    0.0000 C   0  0  0  0  0  0  0  0  0  0  0  0
   -2.0408   -2.4159    0.0000 C   0  0  0  0  0  0  0  0  0  0  0  0
   -1.6283   -3.1303    0.0000 C   0  0  0  0  0  0  0  0  0  0  0  0
   -2.0408   -3.8448    0.0000 C   0  0  0  0  0  0  0  0  0  0  0  0
   -1.6283   -4.5593    0.0000 C   0  0  0  0  0  0  0  0  0  0  0  0
   -2.0408   -5.2737    0.0000 C   0  0  0  0  0  0  0  0  0  0  0  0
   -1.6283   -5.9882    0.0000 C   0  0  0  0  0  0  0  0  0  0  0  0
   -2.5004    1.8678    0.0000 O   0  0  0  0  0  0  0  0  0  0  0  0
   -3.0161    5.9103    0.0000 O   0  0  0  0  0  0  0  0  0  0  0  0
   -3.7792    5.9103    0.0000 P   0  0  0  0  0  0  0  0  0  0  0  0
   -3.7792    5.0853    0.0000 O   0  0  0  0  0  0  0  0  0  0  0  0
   -4.6042    5.9103    0.0000 O   0  0  0  0  0  0  0  0  0  0  0  0
   -3.7792    6.7353    0.0000 O   0  0  0  0  0  0  0  0  0  0  0  0
    0.8684    4.4000    0.0000 O   0  0  0  0  0  0  0  0  0  0  0  0
    0.4559    3.6856    0.0000 C   0  0  0  0  0  0  0  0  0  0  0  0
    0.8684    2.9711    0.0000 C   0  0  0  0  0  0  0  0  0  0  0  0
    0.4559    2.2566    0.0000 C   0  0  0  0  0  0  0  0  0  0  0  0
    0.8684    1.5422    0.0000 C   0  0  0  0  0  0  0  0  0  0  0  0
    0.4559    0.8277    0.0000 C   0  0  0  0  0  0  0  0  0  0  0  0
    0.8684    0.1132    0.0000 C   0  0  0  0  0  0  0  0  0  0  0  0
    0.4559   -0.6013    0.0000 C   0  0  0  0  0  0  0  0  0  0  0  0
    0.8684   -1.3157    0.0000 C   0  0  0  0  0  0  0  0  0  0  0  0
    0.4559   -2.0302    0.0000 C   0  0  0  0  0  0  0  0  0  0  0  0
    0.8684   -2.7447    0.0000 C   0  0  0  0  0  0  0  0  0  0  0  0
    0.4559   -3.4591    0.0000 C   0  0  0  0  0  0  0  0  0  0  0  0
    0.8684   -4.1736    0.0000 C   0  0  0  0  0  0  0  0  0  0  0  0
    0.4559   -4.8881    0.0000 C   0  0  0  0  0  0  0  0  0  0  0  0
    0.8684   -5.6026    0.0000 C   0  0  0  0  0  0  0  0  0  0  0  0
   -0.3691    3.6856    0.0000 O   0  0  0  0  0  0  0  0  0  0  0  0
   -0.3691    2.2566    0.0000 O   0  0  0  0  0  0  0  0  0  0  0  0
    2.6769    3.5987    0.0000 N   0  0  0  0  0  0  0  0  0  0  0  0
    2.2644    2.8842    0.0000 C   0  0  0  0  0  0  0  0  0  0  0  0
    2.6769    2.1698    0.0000 C   0  0  0  0  0  0  0  0  0  0  0  0
    2.2644    1.4553    0.0000 C   0  0  0  0  0  0  0  0  0  0  0  0
    2.6769    0.7408    0.0000 C   0  0  0  0  0  0  0  0  0  0  0  0
    2.2644    0.0264    0.0000 C   0  0  0  0  0  0  0  0  0  0  0  0
    2.6769   -0.6881    0.0000 C   0  0  0  0  0  0  0  0  0  0  0  0
    2.2644   -1.4026    0.0000 C   0  0  0  0  0  0  0  0  0  0  0  0
    2.6769   -2.1171    0.0000 C   0  0  0  0  0  0  0  0  0  0  0  0
    2.2644   -2.8315    0.0000 C   0  0  0  0  0  0  0  0  0  0  0  0
    2.6769   -3.5460    0.0000 C   0  0  0  0  0  0  0  0  0  0  0  0
    2.2644   -4.2605    0.0000 C   0  0  0  0  0  0  0  0  0  0  0  0
    2.6769   -4.9749    0.0000 C   0  0  0  0  0  0  0  0  0  0  0  0
    2.2644   -5.6894    0.0000 C   0  0  0  0  0  0  0  0  0  0  0  0
    2.6769   -6.4039    0.0000 C   0  0  0  0  0  0  0  0  0  0  0  0
    1.4394    2.8842    0.0000 O   0  0  0  0  0  0  0  0  0  0  0  0
    1.4394    1.4553    0.0000 O   0  0  0  0  0  0  0  0  0  0  0  0
    4.0816    3.3615    0.0000 P   0  0  0  0  0  0  0  0  0  0  0  0
    4.0816    2.5365    0.0000 O   0  0  0  0  0  0  0  0  0  0  0  0
    4.9066    3.3615    0.0000 O   0  0  0  0  0  0  0  0  0  0  0  0
    4.0816    4.1865    0.0000 O   0  0  0  0  0  0  0  0  0  0  0  0
  4  5  1  0      
  5  6  1  0      
  6  1  1  0      
  4  7  1  0      
  7  8  1  0      
 12 13  1  0      
 13 14  1  0      
 14  9  1  0      
  8 14  1  0      
 12 11  1  1      
 11 10  1  1      
 10  9  1  1      
  4  3  1  1      
  3  2  1  1      
  2  1  1  1      
  6 15  1  0      
 15 16  1  0      
 12 17  1  0      
  9 18  1  0      
  2 19  1  0      
 19 20  1  0      
 20 21  1  0      
 21 22  1  0      
 22 23  1  0      
 23 24  1  0      
 24 25  1  0      
 25 26  1  0      
 26 27  1  0      
 27 28  1  0      
 28 29  1  0      
 29 30  1  0      
 30 31  1  0      
 31 32  1  0      
 32 33  1  0      
 20 34  2  0      
 35 36  1  0      
 36 37  1  0      
 37 38  1  0      
 38 39  1  0      
 39 40  1  0      
 40 41  1  0      
 41 42  1  0      
 42 43  1  0      
 43 44  1  0      
 44 45  1  0      
 45 46  1  0      
 46 47  1  0      
 47 48  1  0      
 48 49  1  0      
 36 50  2  0      
 51 52  1  0      
 52 53  2  0      
 52 54  1  0      
 54 55  1  0      
 55 56  1  0      
 56 57  1  0      
 57 58  1  0      
 58 59  1  0      
 59 60  1  0      
 60 61  1  0      
 61 62  1  0      
 62 63  1  0      
 63 64  1  0      
 64 65  1  0      
 65 66  1  0      
 67 68  1  0      
 68 69  1  0      
 69 70  1  0      
 70 71  1  0      
 71 72  1  0      
 72 73  1  0      
 73 74  1  0      
 74 75  1  0      
 75 76  1  0      
 76 77  1  0      
 77 78  1  0      
 78 79  1  0      
 80 68  2  0      
 55 67  1  1      
 22 35  1  1      
 81 82  1  0      
 82 83  1  0      
 82 84  1  0      
 82 85  2  0      
 10 86  1  0      
 86 87  1  0      
 87 88  1  0      
 88 89  1  0      
 89 90  1  0      
 90 91  1  0      
 91 92  1  0      
 92 93  1  0      
 93 94  1  0      
 94 95  1  0      
 95 96  1  0      
 96 97  1  0      
 97 98  1  0      
 98 99  1  0      
 99100  1  0      
 87101  2  0      
 89102  1  1      
 11103  1  0      
103104  1  0      
104105  1  0      
105106  1  0      
106107  1  0      
107108  1  0      
108109  1  0      
109110  1  0      
110111  1  0      
111112  1  0      
112113  1  0      
113114  1  0      
114115  1  0      
115116  1  0      
116117  1  0      
104118  2  0      
106119  1  1      
  1 81  1  0      
  3 51  1  0      
 17120  1  0      
120121  1  0      
120122  1  0      
120123  2  0      
M  END
