# Supplementary material for: Identification of Three Genes Encoding for the Late Acyltransferases of Lipid A in Cronobacter sakazakii
Source: MDPI journal article supplement (doi:10.3390/md11020377), 2013-01-31
Supplement: s3 [file s3]

marinedrugs-11-00377-s002.mol
  corina  05201404093D 1   1.00000     0.00000 
CORINA 3.49 0023  12.04.2013
125126  0  0  0  0  0  0  0  0999 V2000
    0.1162    0.1584    0.4297 C   0  0  0  0  0  0  0  0  0  0  0  0
    1.3753    1.0269    0.3467 C   0  0  0  0  0  0  0  0  0  0  0  0
    2.3544    0.5933    1.4421 C   0  0  0  0  0  0  0  0  0  0  0  0
    2.6645   -0.8968    1.2778 C   0  0  0  0  0  0  0  0  0  0  0  0
    1.4479   -1.6443    1.3337 O   0  0  0  0  0  0  0  0  0  0  0  0
    0.5129   -1.3149    0.3044 C   0  0  0  0  0  0  0  0  0  0  0  0
    3.3003   -1.1150    0.0167 O   0  0  0  0  0  0  0  0  0  0  0  0
    3.7343   -2.4607   -0.1903 C   0  0  0  0  0  0  0  0  0  0  0  0
    4.9708   -3.9859   -1.7367 C   0  0  0  0  0  0  0  0  0  0  0  0
    5.5786   -4.1135   -3.1369 C   0  0  0  0  0  0  0  0  0  0  0  0
    4.5033   -3.7926   -4.1796 C   0  0  0  0  0  0  0  0  0  0  0  0
    3.9472   -2.3914   -3.9130 C   0  0  0  0  0  0  0  0  0  0  0  0
    3.4255   -2.3322   -2.5839 O   0  0  0  0  0  0  0  0  0  0  0  0
    4.3966   -2.5772   -1.5646 C   0  0  0  0  0  0  0  0  0  0  0  0
   -0.7324   -2.1924    0.4465 C   0  0  0  0  0  0  0  0  0  0  0  0
   -0.3816   -3.5582    0.2154 O   0  0  0  0  0  0  0  0  0  0  0  0
    2.9041   -2.1069   -4.8475 O   0  0  0  0  0  0  0  0  0  0  0  0
    3.9273   -4.9495   -1.5796 O   0  0  0  0  0  0  0  0  0  0  0  0
    1.0174    2.4209    0.5392 O   0  0  0  0  0  0  0  0  0  0  0  0
    0.7147    3.1297   -0.5598 C   0  0  0  0  0  0  0  0  0  0  0  0
    0.3337    4.5826   -0.4382 C   0  0  0  0  0  0  0  0  0  0  0  0
    0.0398    5.1509   -1.8280 C   0  0  0  0  0  0  0  0  0  0  0  0
   -0.4667    6.5884   -1.6945 C   0  0  0  0  0  0  0  0  0  0  0  0
   -0.8783    7.1140   -3.0712 C   0  0  0  0  0  0  0  0  0  0  0  0
   -1.3848    8.5515   -2.9378 C   0  0  0  0  0  0  0  0  0  0  0  0
   -1.7964    9.0771   -4.3145 C   0  0  0  0  0  0  0  0  0  0  0  0
   -2.3029   10.5147   -4.1810 C   0  0  0  0  0  0  0  0  0  0  0  0
   -2.7145   11.0402   -5.5577 C   0  0  0  0  0  0  0  0  0  0  0  0
   -3.2210   12.4778   -5.4242 C   0  0  0  0  0  0  0  0  0  0  0  0
   -3.6326   13.0034   -6.8009 C   0  0  0  0  0  0  0  0  0  0  0  0
   -4.1391   14.4409   -6.6675 C   0  0  0  0  0  0  0  0  0  0  0  0
   -4.5507   14.9665   -8.0442 C   0  0  0  0  0  0  0  0  0  0  0  0
   -5.0572   16.4040   -7.9107 C   0  0  0  0  0  0  0  0  0  0  0  0
    0.7478    2.6027   -1.6466 O   0  0  0  0  0  0  0  0  0  0  0  0
    1.2546    5.1376   -2.6232 O   0  0  0  0  0  0  0  0  0  0  0  0
    1.1128    4.9946   -3.9503 C   0  0  0  0  0  0  0  0  0  0  0  0
    2.3290    4.9718   -4.8399 C   0  0  0  0  0  0  0  0  0  0  0  0
    1.8924    4.7993   -6.2961 C   0  0  0  0  0  0  0  0  0  0  0  0
    3.1271    4.7761   -7.1994 C   0  0  0  0  0  0  0  0  0  0  0  0
    2.6906    4.6036   -8.6556 C   0  0  0  0  0  0  0  0  0  0  0  0
    3.9253    4.5805   -9.5588 C   0  0  0  0  0  0  0  0  0  0  0  0
    3.4888    4.4079  -11.0150 C   0  0  0  0  0  0  0  0  0  0  0  0
    4.7235    4.3848  -11.9183 C   0  0  0  0  0  0  0  0  0  0  0  0
    4.2870    4.2122  -13.3745 C   0  0  0  0  0  0  0  0  0  0  0  0
    5.5217    4.1891  -14.2777 C   0  0  0  0  0  0  0  0  0  0  0  0
    5.0851    4.0166  -15.7339 C   0  0  0  0  0  0  0  0  0  0  0  0
    6.3199    3.9934  -16.6372 C   0  0  0  0  0  0  0  0  0  0  0  0
    5.8833    3.8209  -18.0934 C   0  0  0  0  0  0  0  0  0  0  0  0
    7.1180    3.7977  -18.9966 C   0  0  0  0  0  0  0  0  0  0  0  0
    0.0100    4.8842   -4.4315 O   0  0  0  0  0  0  0  0  0  0  0  0
    3.5930    1.3670    1.3258 N   0  0  0  0  0  0  0  0  0  0  0  0
    4.3803    1.5447    2.4052 C   0  0  0  0  0  0  0  0  0  0  0  0
    4.0634    1.0642    3.4727 O   0  0  0  0  0  0  0  0  0  0  0  0
    5.6545    2.3405    2.2856 C   0  0  0  0  0  0  0  0  0  0  0  0
    6.2767    2.5184    3.6720 C   0  0  0  0  0  0  0  0  0  0  0  0
    5.3210    3.3162    4.5614 C   0  0  0  0  0  0  0  0  0  0  0  0
    5.9970    3.6092    5.9023 C   0  0  0  0  0  0  0  0  0  0  0  0
    5.0413    4.4070    6.7917 C   0  0  0  0  0  0  0  0  0  0  0  0
    5.7173    4.7000    8.1326 C   0  0  0  0  0  0  0  0  0  0  0  0
    4.7616    5.4978    9.0220 C   0  0  0  0  0  0  0  0  0  0  0  0
    5.4376    5.7908   10.3629 C   0  0  0  0  0  0  0  0  0  0  0  0
    4.4819    6.5886   11.2523 C   0  0  0  0  0  0  0  0  0  0  0  0
    5.1579    6.8817   12.5932 C   0  0  0  0  0  0  0  0  0  0  0  0
    4.2022    7.6794   13.4826 C   0  0  0  0  0  0  0  0  0  0  0  0
    4.8782    7.9725   14.8235 C   0  0  0  0  0  0  0  0  0  0  0  0
    3.9225    8.7702   15.7129 C   0  0  0  0  0  0  0  0  0  0  0  0
    6.5163    1.2152    4.2658 O   0  0  0  0  0  0  0  0  0  0  0  0
    7.6674    0.6026    3.9470 C   0  0  0  0  0  0  0  0  0  0  0  0
    7.9342   -0.7992    4.4314 C   0  0  0  0  0  0  0  0  0  0  0  0
    9.3054   -1.2590    3.9321 C   0  0  0  0  0  0  0  0  0  0  0  0
    9.5762   -2.6823    4.4239 C   0  0  0  0  0  0  0  0  0  0  0  0
   10.9474   -3.1421    3.9246 C   0  0  0  0  0  0  0  0  0  0  0  0
   11.2182   -4.5654    4.4164 C   0  0  0  0  0  0  0  0  0  0  0  0
   12.5894   -5.0252    3.9171 C   0  0  0  0  0  0  0  0  0  0  0  0
   12.8603   -6.4485    4.4089 C   0  0  0  0  0  0  0  0  0  0  0  0
   14.2315   -6.9083    3.9096 C   0  0  0  0  0  0  0  0  0  0  0  0
   14.5023   -8.3316    4.4014 C   0  0  0  0  0  0  0  0  0  0  0  0
   15.8735   -8.7914    3.9021 C   0  0  0  0  0  0  0  0  0  0  0  0
   16.1444  -10.2147    4.3938 C   0  0  0  0  0  0  0  0  0  0  0  0
    8.4896    1.1752    3.2718 O   0  0  0  0  0  0  0  0  0  0  0  0
   -0.5305    0.3738    1.6856 O   0  0  0  0  0  0  0  0  0  0  0  0
   -2.0388    0.9226    1.8125 P   0  0  0  0  0  0  0  0  0  0  0  0
   -2.4831    0.9183    3.3599 O   0  0  0  0  0  0  0  0  0  0  0  0
   -2.1136    2.4244    1.2369 O   0  0  0  0  0  0  0  0  0  0  0  0
   -2.9480    0.0507    1.0357 O   0  0  0  0  0  0  0  0  0  0  0  0
    6.0592   -5.4691   -3.3362 O   0  0  0  0  0  0  0  0  0  0  0  0
    7.3323   -5.7209   -2.9932 C   0  0  0  0  0  0  0  0  0  0  0  0
    7.9010   -7.1050   -3.1715 C   0  0  0  0  0  0  0  0  0  0  0  0
    9.3589   -7.1211   -2.7077 C   0  0  0  0  0  0  0  0  0  0  0  0
    9.8987   -8.5513   -2.7713 C   0  0  0  0  0  0  0  0  0  0  0  0
   11.3138   -8.5886   -2.1910 C   0  0  0  0  0  0  0  0  0  0  0  0
   11.8536  -10.0188   -2.2546 C   0  0  0  0  0  0  0  0  0  0  0  0
   13.2688  -10.0561   -1.6743 C   0  0  0  0  0  0  0  0  0  0  0  0
   13.8086  -11.4863   -1.7380 C   0  0  0  0  0  0  0  0  0  0  0  0
   15.2237  -11.5236   -1.1576 C   0  0  0  0  0  0  0  0  0  0  0  0
   15.7635  -12.9538   -1.2213 C   0  0  0  0  0  0  0  0  0  0  0  0
   17.1787  -12.9911   -0.6410 C   0  0  0  0  0  0  0  0  0  0  0  0
   17.7185  -14.4214   -0.7046 C   0  0  0  0  0  0  0  0  0  0  0  0
   19.1336  -14.4587   -0.1243 C   0  0  0  0  0  0  0  0  0  0  0  0
   19.6734  -15.8889   -0.1880 C   0  0  0  0  0  0  0  0  0  0  0  0
    8.0222   -4.8379   -2.5414 O   0  0  0  0  0  0  0  0  0  0  0  0
   10.1389   -6.2792   -3.5590 O   0  0  0  0  0  0  0  0  0  0  0  0
    5.0921   -3.8388   -5.5202 N   0  0  0  0  0  0  0  0  0  0  0  0
    4.3116   -4.0862   -6.5908 C   0  0  0  0  0  0  0  0  0  0  0  0
    4.9172   -4.1337   -7.9699 C   0  0  0  0  0  0  0  0  0  0  0  0
    3.8229   -4.4293   -8.9976 C   0  0  0  0  0  0  0  0  0  0  0  0
    4.4133   -4.3545  -10.4071 C   0  0  0  0  0  0  0  0  0  0  0  0
    3.2958   -4.5264  -11.4379 C   0  0  0  0  0  0  0  0  0  0  0  0
    3.8862   -4.4516  -12.8474 C   0  0  0  0  0  0  0  0  0  0  0  0
    2.7687   -4.6235  -13.8782 C   0  0  0  0  0  0  0  0  0  0  0  0
    3.3591   -4.5487  -15.2877 C   0  0  0  0  0  0  0  0  0  0  0  0
    2.2416   -4.7207  -16.3185 C   0  0  0  0  0  0  0  0  0  0  0  0
    2.8320   -4.6458  -17.7280 C   0  0  0  0  0  0  0  0  0  0  0  0
    1.7145   -4.8178  -18.7588 C   0  0  0  0  0  0  0  0  0  0  0  0
    2.3049   -4.7429  -20.1684 C   0  0  0  0  0  0  0  0  0  0  0  0
    1.1874   -4.9149  -21.1992 C   0  0  0  0  0  0  0  0  0  0  0  0
    1.7778   -4.8401  -22.6087 C   0  0  0  0  0  0  0  0  0  0  0  0
    3.1219   -4.2706   -6.4443 O   0  0  0  0  0  0  0  0  0  0  0  0
    3.2971   -5.7385   -8.7703 O   0  0  0  0  0  0  0  0  0  0  0  0
    2.5680   -0.6182   -5.3601 P   0  0  0  0  0  0  0  0  0  0  0  0
    3.8152   -0.0462   -6.2024 O   0  0  0  0  0  0  0  0  0  0  0  0
    1.2595   -0.6560   -6.2974 O   0  0  0  0  0  0  0  0  0  0  0  0
    2.3153    0.2593   -4.1953 O   0  0  0  0  0  0  0  0  0  0  0  0
   17.5156  -10.6745    3.8946 C   0  0  0  0  0  0  0  0  0  0  0  0
   17.7864  -12.0978    4.3863 C   0  0  0  0  0  0  0  0  0  0  0  0
  4  5  1  0      
  5  6  1  0      
  6  1  1  0      
  4  7  1  0      
  7  8  1  0      
 12 13  1  0      
 13 14  1  0      
 14  9  1  0      
  8 14  1  0      
 12 11  1  0      
 11 10  1  0      
 10  9  1  0      
  4  3  1  0      
  3  2  1  0      
  2  1  1  0      
  6 15  1  0      
 15 16  1  0      
 12 17  1  0      
  9 18  1  0      
  2 19  1  0      
 19 20  1  0      
 20 21  1  0      
 21 22  1  0      
 22 23  1  0      
 23 24  1  0      
 24 25  1  0      
 25 26  1  0      
 26 27  1  0      
 27 28  1  0      
 28 29  1  0      
 29 30  1  0      
 30 31  1  0      
 31 32  1  0      
 32 33  1  0      
 20 34  2  0      
 35 36  1  0      
 36 37  1  0      
 37 38  1  0      
 38 39  1  0      
 39 40  1  0      
 40 41  1  0      
 41 42  1  0      
 42 43  1  0      
 43 44  1  0      
 44 45  1  0      
 45 46  1  0      
 46 47  1  0      
 47 48  1  0      
 48 49  1  0      
 36 50  2  0      
 51 52  1  0      
 52 53  2  0      
 52 54  1  0      
 54 55  1  0      
 55 56  1  0      
 56 57  1  0      
 57 58  1  0      
 58 59  1  0      
 59 60  1  0      
 60 61  1  0      
 61 62  1  0      
 62 63  1  0      
 63 64  1  0      
 64 65  1  0      
 65 66  1  0      
 67 68  1  0      
 68 69  1  0      
 69 70  1  0      
 70 71  1  0      
 71 72  1  0      
 72 73  1  0      
 73 74  1  0      
 74 75  1  0      
 75 76  1  0      
 76 77  1  0      
 77 78  1  0      
 78 79  1  0      
 80 68  2  0      
 55 67  1  0      
 22 35  1  0      
 81 82  1  0      
 82 83  1  0      
 82 84  1  0      
 82 85  2  0      
 10 86  1  0      
 86 87  1  0      
 87 88  1  0      
 88 89  1  0      
 89 90  1  0      
 90 91  1  0      
 91 92  1  0      
 92 93  1  0      
 93 94  1  0      
 94 95  1  0      
 95 96  1  0      
 96 97  1  0      
 97 98  1  0      
 98 99  1  0      
 99100  1  0      
 87101  2  0      
 89102  1  0      
 11103  1  0      
103104  1  0      
104105  1  0      
105106  1  0      
106107  1  0      
107108  1  0      
108109  1  0      
109110  1  0      
110111  1  0      
111112  1  0      
112113  1  0      
113114  1  0      
114115  1  0      
115116  1  0      
116117  1  0      
104118  2  0      
106119  1  0      
  1 81  1  0      
  3 51  1  0      
 17120  1  0      
120121  1  0      
120122  1  0      
120123  2  0      
 79124  1  0      
124125  1  0      
M  END
$$$$
