# Supplementary material for: Identification of Three Genes Encoding for the Late Acyltransferases of Lipid A in Cronobacter sakazakii
Source: MDPI journal article supplement (doi:10.3390/md11020377), 2013-01-31
Supplement: s4 [file s4]

marinedrugs-11-00377-s002.mol
  ChemDraw04241410112D

125126  0  0  0  0  0  0  0  0999 V2000
   -2.0472    6.2525    0.0000 C   0  0  0  0  0  0  0  0  0  0  0  0
   -1.6347    5.5380    0.0000 C   0  0  0  0  0  0  0  0  0  0  0  0
   -0.8366    5.7471    0.0000 C   0  0  0  0  0  0  0  0  0  0  0  0
   -0.0434    5.5380    0.0000 C   0  0  0  0  0  0  0  0  0  0  0  0
   -0.4558    6.2525    0.0000 O   0  0  0  0  0  0  0  0  0  0  0  0
   -1.2540    6.0435    0.0000 C   0  0  0  0  0  0  0  0  0  0  0  0
    0.6711    5.9505    0.0000 O   0  0  0  0  0  0  0  0  0  0  0  0
    1.5833    5.7769    0.0000 C   0  0  0  0  0  0  0  0  0  0  0  0
    1.2528    5.2419    0.0000 C   0  0  0  0  0  0  0  0  0  0  0  0
    1.6653    4.5274    0.0000 C   0  0  0  0  0  0  0  0  0  0  0  0
    2.4634    4.7365    0.0000 C   0  0  0  0  0  0  0  0  0  0  0  0
    3.2566    4.5274    0.0000 C   0  0  0  0  0  0  0  0  0  0  0  0
    2.8442    5.2419    0.0000 O   0  0  0  0  0  0  0  0  0  0  0  0
    2.0460    5.0329    0.0000 C   0  0  0  0  0  0  0  0  0  0  0  0
   -1.8373    6.6269    0.0000 C   0  0  0  0  0  0  0  0  0  0  0  0
   -1.0405    6.8404    0.0000 O   0  0  0  0  0  0  0  0  0  0  0  0
    3.2566    3.7024    0.0000 O   0  0  0  0  0  0  0  0  0  0  0  0
    0.5383    4.8294    0.0000 O   0  0  0  0  0  0  0  0  0  0  0  0
   -2.4316    5.7516    0.0000 O   0  0  0  0  0  0  0  0  0  0  0  0
   -2.8441    5.0371    0.0000 C   0  0  0  0  0  0  0  0  0  0  0  0
   -2.4316    4.3226    0.0000 C   0  0  0  0  0  0  0  0  0  0  0  0
   -2.8441    3.6082    0.0000 C   0  0  0  0  0  0  0  0  0  0  0  0
   -2.4316    2.8937    0.0000 C   0  0  0  0  0  0  0  0  0  0  0  0
   -2.8441    2.1792    0.0000 C   0  0  0  0  0  0  0  0  0  0  0  0
   -2.4316    1.4647    0.0000 C   0  0  0  0  0  0  0  0  0  0  0  0
   -2.8441    0.7503    0.0000 C   0  0  0  0  0  0  0  0  0  0  0  0
   -2.4316    0.0358    0.0000 C   0  0  0  0  0  0  0  0  0  0  0  0
   -2.8441   -0.6787    0.0000 C   0  0  0  0  0  0  0  0  0  0  0  0
   -2.4316   -1.3931    0.0000 C   0  0  0  0  0  0  0  0  0  0  0  0
   -2.8441   -2.1076    0.0000 C   0  0  0  0  0  0  0  0  0  0  0  0
   -2.4316   -2.8221    0.0000 C   0  0  0  0  0  0  0  0  0  0  0  0
   -2.8441   -3.5366    0.0000 C   0  0  0  0  0  0  0  0  0  0  0  0
   -2.4316   -4.2510    0.0000 C   0  0  0  0  0  0  0  0  0  0  0  0
   -3.6691    5.0371    0.0000 O   0  0  0  0  0  0  0  0  0  0  0  0
   -3.6691    3.6082    0.0000 O   0  0  0  0  0  0  0  0  0  0  0  0
   -4.0816    2.8937    0.0000 C   0  0  0  0  0  0  0  0  0  0  0  0
   -3.6691    2.1792    0.0000 C   0  0  0  0  0  0  0  0  0  0  0  0
   -4.0816    1.4647    0.0000 C   0  0  0  0  0  0  0  0  0  0  0  0
   -3.6691    0.7503    0.0000 C   0  0  0  0  0  0  0  0  0  0  0  0
   -4.0816    0.0358    0.0000 C   0  0  0  0  0  0  0  0  0  0  0  0
   -3.6691   -0.6787    0.0000 C   0  0  0  0  0  0  0  0  0  0  0  0
   -4.0816   -1.3931    0.0000 C   0  0  0  0  0  0  0  0  0  0  0  0
   -3.6691   -2.1076    0.0000 C   0  0  0  0  0  0  0  0  0  0  0  0
   -4.0816   -2.8221    0.0000 C   0  0  0  0  0  0  0  0  0  0  0  0
   -3.6691   -3.5366    0.0000 C   0  0  0  0  0  0  0  0  0  0  0  0
   -4.0816   -4.2510    0.0000 C   0  0  0  0  0  0  0  0  0  0  0  0
   -3.6691   -4.9655    0.0000 C   0  0  0  0  0  0  0  0  0  0  0  0
   -4.0816   -5.6800    0.0000 C   0  0  0  0  0  0  0  0  0  0  0  0
   -3.6691   -6.3944    0.0000 C   0  0  0  0  0  0  0  0  0  0  0  0
   -4.9066    2.8937    0.0000 O   0  0  0  0  0  0  0  0  0  0  0  0
   -0.3908    5.0698    0.0000 N   0  0  0  0  0  0  0  0  0  0  0  0
   -0.8033    4.3553    0.0000 C   0  0  0  0  0  0  0  0  0  0  0  0
   -1.6283    4.3553    0.0000 O   0  0  0  0  0  0  0  0  0  0  0  0
   -0.3908    3.6408    0.0000 C   0  0  0  0  0  0  0  0  0  0  0  0
   -0.8033    2.9263    0.0000 C   0  0  0  0  0  0  0  0  0  0  0  0
   -0.3908    2.2119    0.0000 C   0  0  0  0  0  0  0  0  0  0  0  0
   -0.8033    1.4974    0.0000 C   0  0  0  0  0  0  0  0  0  0  0  0
   -0.3908    0.7829    0.0000 C   0  0  0  0  0  0  0  0  0  0  0  0
   -0.8033    0.0685    0.0000 C   0  0  0  0  0  0  0  0  0  0  0  0
   -0.3908   -0.6460    0.0000 C   0  0  0  0  0  0  0  0  0  0  0  0
   -0.8033   -1.3605    0.0000 C   0  0  0  0  0  0  0  0  0  0  0  0
   -0.3908   -2.0750    0.0000 C   0  0  0  0  0  0  0  0  0  0  0  0
   -0.8033   -2.7894    0.0000 C   0  0  0  0  0  0  0  0  0  0  0  0
   -0.3908   -3.5039    0.0000 C   0  0  0  0  0  0  0  0  0  0  0  0
   -0.8033   -4.2184    0.0000 C   0  0  0  0  0  0  0  0  0  0  0  0
   -0.3908   -4.9328    0.0000 C   0  0  0  0  0  0  0  0  0  0  0  0
   -1.6283    2.9263    0.0000 O   0  0  0  0  0  0  0  0  0  0  0  0
   -2.0408    2.2119    0.0000 C   0  0  0  0  0  0  0  0  0  0  0  0
   -1.6283    1.4974    0.0000 C   0  0  0  0  0  0  0  0  0  0  0  0
   -2.0408    0.7829    0.0000 C   0  0  0  0  0  0  0  0  0  0  0  0
   -1.6283    0.0685    0.0000 C   0  0  0  0  0  0  0  0  0  0  0  0
   -2.0408   -0.6460    0.0000 C   0  0  0  0  0  0  0  0  0  0  0  0
   -1.6283   -1.3605    0.0000 C   0  0  0  0  0  0  0  0  0  0  0  0
   -2.0408   -2.0750    0.0000 C   0  0  0  0  0  0  0  0  0  0  0  0
   -1.6283   -2.7894    0.0000 C   0  0  0  0  0  0  0  0  0  0  0  0
   -2.0408   -3.5039    0.0000 C   0  0  0  0  0  0  0  0  0  0  0  0
   -1.6283   -4.2184    0.0000 C   0  0  0  0  0  0  0  0  0  0  0  0
   -2.0408   -4.9328    0.0000 C   0  0  0  0  0  0  0  0  0  0  0  0
   -1.6283   -5.6473    0.0000 C   0  0  0  0  0  0  0  0  0  0  0  0
   -2.5004    2.2087    0.0000 O   0  0  0  0  0  0  0  0  0  0  0  0
   -3.0161    6.2512    0.0000 O   0  0  0  0  0  0  0  0  0  0  0  0
   -3.7792    6.2512    0.0000 P   0  0  0  0  0  0  0  0  0  0  0  0
   -3.7792    5.4262    0.0000 O   0  0  0  0  0  0  0  0  0  0  0  0
   -4.6042    6.2512    0.0000 O   0  0  0  0  0  0  0  0  0  0  0  0
   -3.7792    7.0762    0.0000 O   0  0  0  0  0  0  0  0  0  0  0  0
    0.8684    4.7409    0.0000 O   0  0  0  0  0  0  0  0  0  0  0  0
    0.4559    4.0265    0.0000 C   0  0  0  0  0  0  0  0  0  0  0  0
    0.8684    3.3120    0.0000 C   0  0  0  0  0  0  0  0  0  0  0  0
    0.4559    2.5975    0.0000 C   0  0  0  0  0  0  0  0  0  0  0  0
    0.8684    1.8831    0.0000 C   0  0  0  0  0  0  0  0  0  0  0  0
    0.4559    1.1686    0.0000 C   0  0  0  0  0  0  0  0  0  0  0  0
    0.8684    0.4541    0.0000 C   0  0  0  0  0  0  0  0  0  0  0  0
    0.4559   -0.2604    0.0000 C   0  0  0  0  0  0  0  0  0  0  0  0
    0.8684   -0.9748    0.0000 C   0  0  0  0  0  0  0  0  0  0  0  0
    0.4559   -1.6893    0.0000 C   0  0  0  0  0  0  0  0  0  0  0  0
    0.8684   -2.4038    0.0000 C   0  0  0  0  0  0  0  0  0  0  0  0
    0.4559   -3.1182    0.0000 C   0  0  0  0  0  0  0  0  0  0  0  0
    0.8684   -3.8327    0.0000 C   0  0  0  0  0  0  0  0  0  0  0  0
    0.4559   -4.5472    0.0000 C   0  0  0  0  0  0  0  0  0  0  0  0
    0.8684   -5.2617    0.0000 C   0  0  0  0  0  0  0  0  0  0  0  0
   -0.3691    4.0265    0.0000 O   0  0  0  0  0  0  0  0  0  0  0  0
   -0.3691    2.5975    0.0000 O   0  0  0  0  0  0  0  0  0  0  0  0
    2.6769    3.9396    0.0000 N   0  0  0  0  0  0  0  0  0  0  0  0
    2.2644    3.2251    0.0000 C   0  0  0  0  0  0  0  0  0  0  0  0
    2.6769    2.5107    0.0000 C   0  0  0  0  0  0  0  0  0  0  0  0
    2.2644    1.7962    0.0000 C   0  0  0  0  0  0  0  0  0  0  0  0
    2.6769    1.0817    0.0000 C   0  0  0  0  0  0  0  0  0  0  0  0
    2.2644    0.3673    0.0000 C   0  0  0  0  0  0  0  0  0  0  0  0
    2.6769   -0.3472    0.0000 C   0  0  0  0  0  0  0  0  0  0  0  0
    2.2644   -1.0617    0.0000 C   0  0  0  0  0  0  0  0  0  0  0  0
    2.6769   -1.7761    0.0000 C   0  0  0  0  0  0  0  0  0  0  0  0
    2.2644   -2.4906    0.0000 C   0  0  0  0  0  0  0  0  0  0  0  0
    2.6769   -3.2051    0.0000 C   0  0  0  0  0  0  0  0  0  0  0  0
    2.2644   -3.9196    0.0000 C   0  0  0  0  0  0  0  0  0  0  0  0
    2.6769   -4.6340    0.0000 C   0  0  0  0  0  0  0  0  0  0  0  0
    2.2644   -5.3485    0.0000 C   0  0  0  0  0  0  0  0  0  0  0  0
    2.6769   -6.0630    0.0000 C   0  0  0  0  0  0  0  0  0  0  0  0
    1.4394    3.2251    0.0000 O   0  0  0  0  0  0  0  0  0  0  0  0
    1.4394    1.7962    0.0000 O   0  0  0  0  0  0  0  0  0  0  0  0
    4.0816    3.7024    0.0000 P   0  0  0  0  0  0  0  0  0  0  0  0
    4.0816    2.8774    0.0000 O   0  0  0  0  0  0  0  0  0  0  0  0
    4.9066    3.7024    0.0000 O   0  0  0  0  0  0  0  0  0  0  0  0
    4.0816    4.5274    0.0000 O   0  0  0  0  0  0  0  0  0  0  0  0
   -2.0408   -6.3618    0.0000 C   0  0  0  0  0  0  0  0  0  0  0  0
   -1.6283   -7.0762    0.0000 C   0  0  0  0  0  0  0  0  0  0  0  0
  4  5  1  0      
  5  6  1  0      
  6  1  1  0      
  4  7  1  0      
  7  8  1  0      
 12 13  1  0      
 13 14  1  0      
 14  9  1  0      
  8 14  1  0      
 12 11  1  1      
 11 10  1  1      
 10  9  1  1      
  4  3  1  1      
  3  2  1  1      
  2  1  1  1      
  6 15  1  0      
 15 16  1  0      
 12 17  1  0      
  9 18  1  0      
  2 19  1  0      
 19 20  1  0      
 20 21  1  0      
 21 22  1  0      
 22 23  1  0      
 23 24  1  0      
 24 25  1  0      
 25 26  1  0      
 26 27  1  0      
 27 28  1  0      
 28 29  1  0      
 29 30  1  0      
 30 31  1  0      
 31 32  1  0      
 32 33  1  0      
 20 34  2  0      
 35 36  1  0      
 36 37  1  0      
 37 38  1  0      
 38 39  1  0      
 39 40  1  0      
 40 41  1  0      
 41 42  1  0      
 42 43  1  0      
 43 44  1  0      
 44 45  1  0      
 45 46  1  0      
 46 47  1  0      
 47 48  1  0      
 48 49  1  0      
 36 50  2  0      
 51 52  1  0      
 52 53  2  0      
 52 54  1  0      
 54 55  1  0      
 55 56  1  0      
 56 57  1  0      
 57 58  1  0      
 58 59  1  0      
 59 60  1  0      
 60 61  1  0      
 61 62  1  0      
 62 63  1  0      
 63 64  1  0      
 64 65  1  0      
 65 66  1  0      
 67 68  1  0      
 68 69  1  0      
 69 70  1  0      
 70 71  1  0      
 71 72  1  0      
 72 73  1  0      
 73 74  1  0      
 74 75  1  0      
 75 76  1  0      
 76 77  1  0      
 77 78  1  0      
 78 79  1  0      
 80 68  2  0      
 55 67  1  1      
 22 35  1  1      
 81 82  1  0      
 82 83  1  0      
 82 84  1  0      
 82 85  2  0      
 10 86  1  0      
 86 87  1  0      
 87 88  1  0      
 88 89  1  0      
 89 90  1  0      
 90 91  1  0      
 91 92  1  0      
 92 93  1  0      
 93 94  1  0      
 94 95  1  0      
 95 96  1  0      
 96 97  1  0      
 97 98  1  0      
 98 99  1  0      
 99100  1  0      
 87101  2  0      
 89102  1  1      
 11103  1  0      
103104  1  0      
104105  1  0      
105106  1  0      
106107  1  0      
107108  1  0      
108109  1  0      
109110  1  0      
110111  1  0      
111112  1  0      
112113  1  0      
113114  1  0      
114115  1  0      
115116  1  0      
116117  1  0      
104118  2  0      
106119  1  1      
  1 81  1  0      
  3 51  1  0      
 17120  1  0      
120121  1  0      
120122  1  0      
120123  2  0      
 79124  1  0      
124125  1  0      
M  END
